# Supplementary figures and images for: Improved NMDA Receptor Activation by the Secreted Amyloid-Protein Precursor-α in Healthy Aging: A Role for D-Serine?
Source: MDPI journal article supplement (doi:10.3390/ijms232415542), 2022-12-08

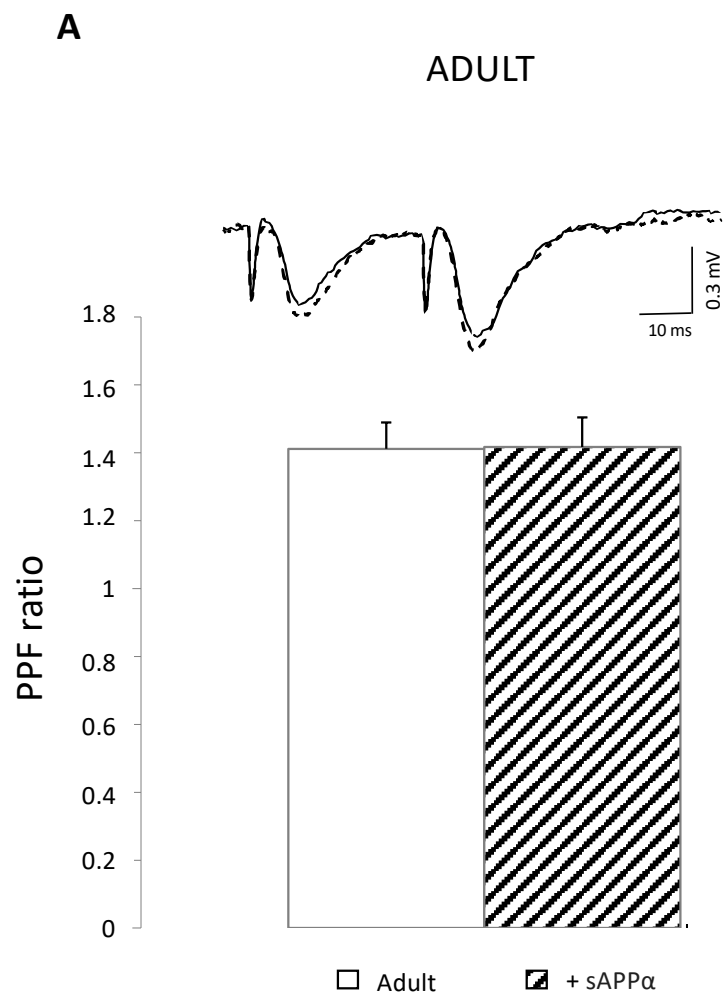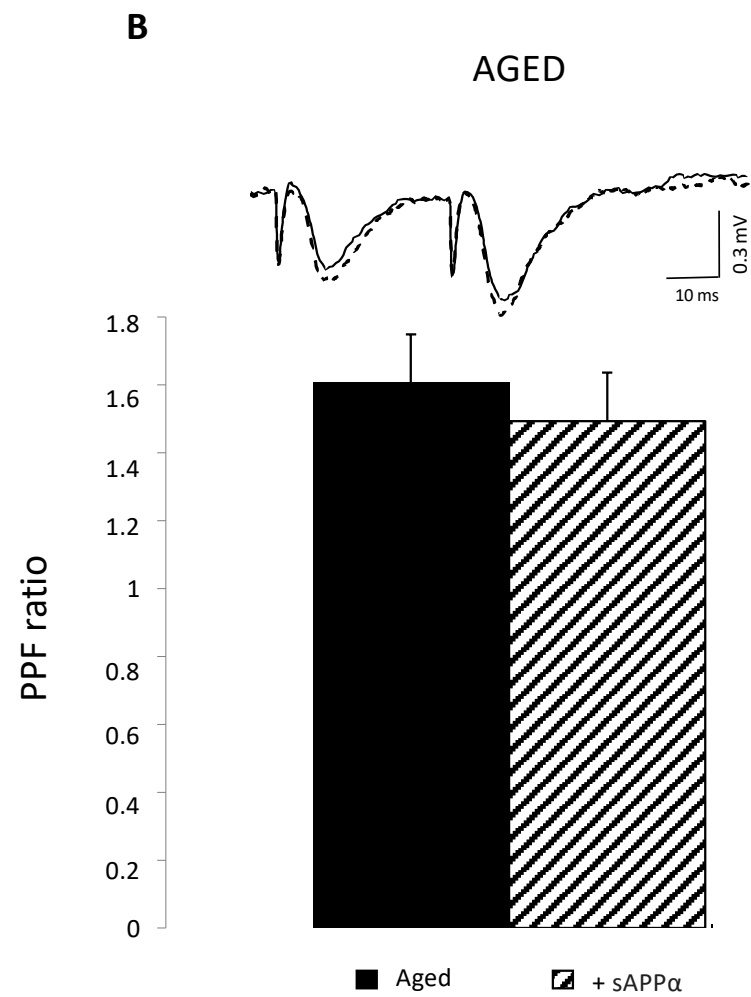

Supplement: s1 [file s1]
